# Supplementary material for: Efficacy and safety of aliskiren combination therapy: a protocol for an umbrella review
Source: PubMed Central journal article supplement — BMJ Open. 2021 Mar 9;11(3):e043807. doi: 10.1136/bmjopen-2020-043807 (PMC7944987; doi:10.1136/bmjopen-2020-043807), 2021-03-09
Supplement: bmjopen-2020-043807supp001.pdf [file bmjopen-2020-043807supp001.pdf]

## Supplementary 1

## Search Pubmed

#1 "aliskiren"[Supplementary Concept]

#2 "Rasilez"[Title/Abstract]

#3 "tekturna"[Title/Abstract]

#4 "spp100"[Title/Abstract]

#5 "renin angiotensin inhibition"[Title/Abstract]

#6 "direct renin inhibitor"[Title/Abstract]

#7 "aliskiren"[Title/Abstract]

#8 #1 OR #2 OR #3 OR #4 OR #5 OR #6 OR #7

Filters: Meta-Analysis, Systematic Review
